# Supplementary material
Source: PubMed Central journal article supplement (PMC2868480)
Supplement: supp_51_5_2705__1.pdf [file supp_51_5_2705__1.pdf]

# Supp. Fig. 1

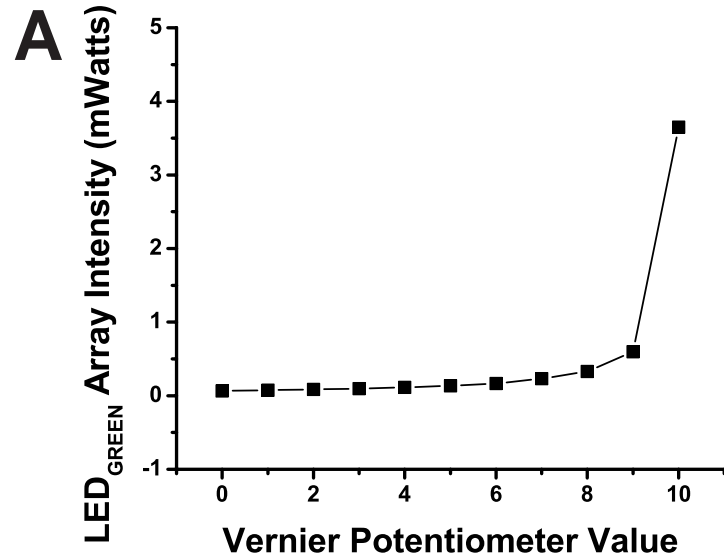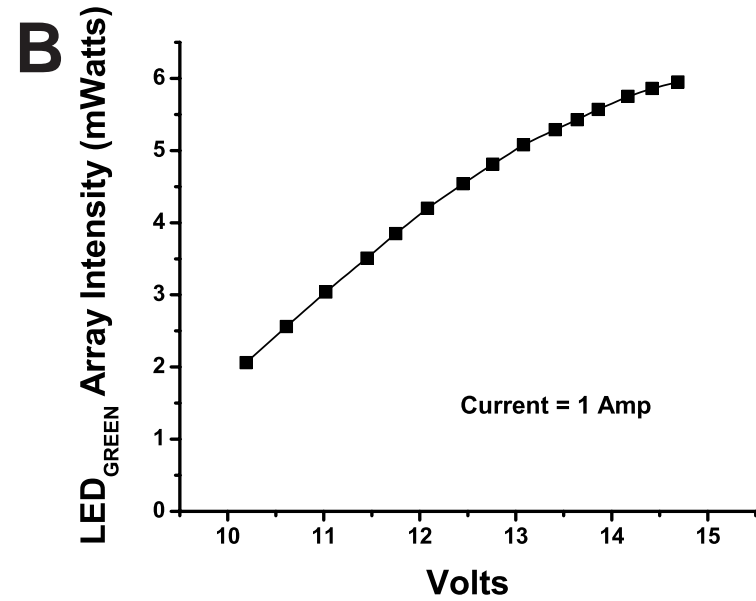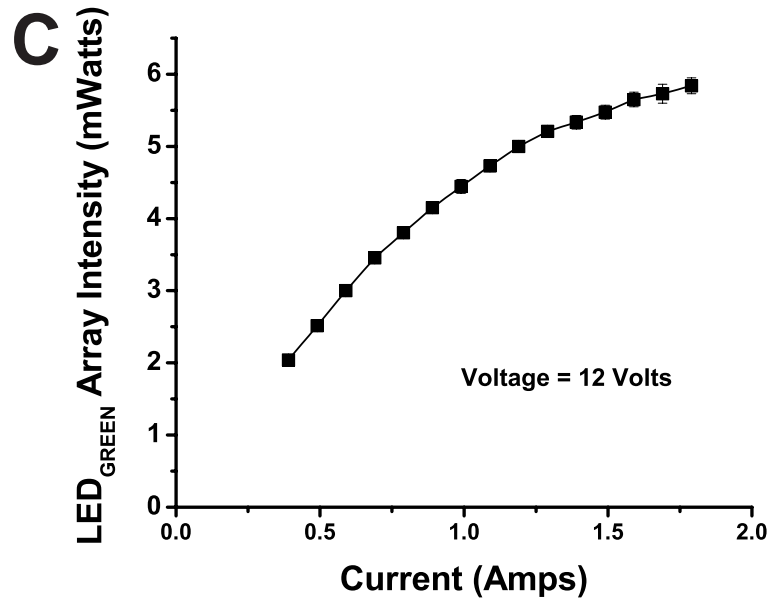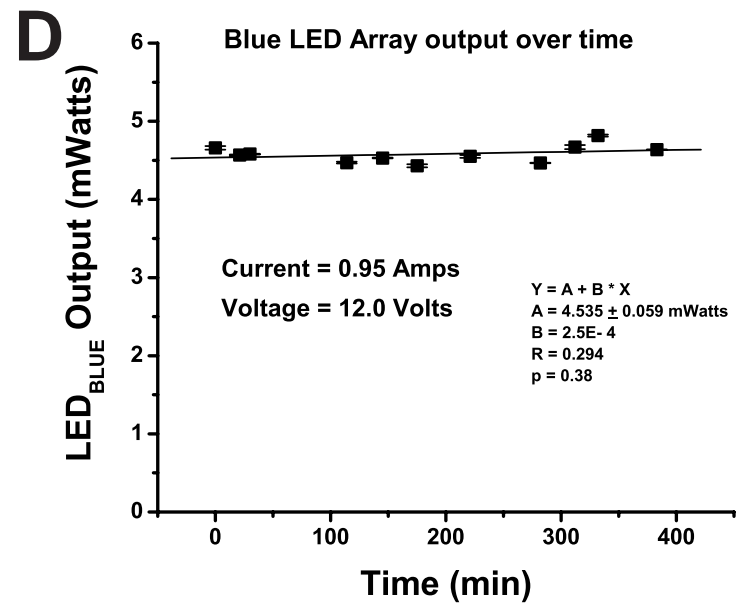

**Supplementary Figure S1.** DC power control over LED array optical output. **(A)** The original power source was used to drive the 525 nm array. Use of the linear potentiometer allows proportional increase in LED output. At a setting of approximately 10 light intensity increases markedly. The latter effect was due to poor voltage control in the driving power supply at high current demand. **(B)** With the linear controlled power supply the LED<sub>525 nm</sub> array begins to conduct current and generate light below 10 VDC driving force. The voltage source must exceed the gang driving voltage ( $V_f$ ) for the LEDs to conduct. At constant current ( $I = 1$  Amps) increase in constant voltage (10-15 volts) drives greater light emission toward saturation for the LED<sub>526 nm</sub> green LED array in a hyperbolic relationship, which was not subjected to nonlinear curve fitting. Output is proportional until saturation. **(C)** The same linear DC power supply was used to drive the LED<sub>525 nm</sub> green array under constant voltage conditions ( $V = 12V$ ) over a range of constant 0-2 amperes. Again, LED array output is linear with respect to current up to saturation. For Figs 5B and 5C there was some drop in potential and voltage at high LED drive into saturation due to the strong nonlinearity of the LED device I-V curves. **(D)** The output of the LED<sub>470 nm</sub> array was measured over time from several points just above the LED surface of the array. Output is essentially constant over time.
