# Supplementary material
Source: PubMed Central journal article supplement (PMC2868480)
Supplement: supp_51_5_2705__3.pdf [file supp_51_5_2705__3.pdf]

## **Supplementary Table S1. HTS PDT Screening Box- Planned Enhancements**

1. Pulsed light with regulation of intensity and temporal pulse width presentation ( $\Delta t$ ).
2. Liquid crystal display for intensity and pulse width settings.
3. Automatic electro-optical recognition of emission wavelength of any array attached.
4. Internal box measures of light intensity calibrated to the peak wavelength and distribution.
5. Multiple array platforms attached to a single larger instrument.
6. Cooled aluminum block LED arrays
